# Supplementary material
Source: PubMed Central journal article supplement (PMC8956209)
Supplement: NIHMS1775138-supplement-1.pdf [file NIHMS1775138-supplement-1.pdf]

**Supplemental Table 1: Demographics and Family Representation in Pathogenic Variant Groupings**

| <b>Dataset A:</b>                                  | # of Pathogenic Variant Carriers/Families | # Variants | Variants Represented in Domain-Based Grouping                                                                                                                                                                                               | Baseline EYO (mean years/SD) | Baseline Age (mean years/SD) | Familial Age of Onset (mean years/SD) |
|----------------------------------------------------|-------------------------------------------|------------|---------------------------------------------------------------------------------------------------------------------------------------------------------------------------------------------------------------------------------------------|------------------------------|------------------------------|---------------------------------------|
| <i>APP Transmembrane Domain</i>                    | 25 / 17                                   | 6          | APP:p.Val715Ala, APP:p.Ile716Phe, APP:p.Ile716Val, APP:p.Val717Ile, APP:p.Val717Leu, APP:p.Leu723Arg                                                                                                                                        | -10.52/11.69                 | 37.72/10.95                  | 48.24/7.68                            |
| <i>PSEN2 Transmembrane Domain 2</i>                | 16 / 2                                    | 1          | PSEN2:p.Asn141Ile                                                                                                                                                                                                                           | -11.53/10.09                 | 38.62/9.93                   | 50.16/NA                              |
| <i>PSEN1 Cytoplasmic Domain 4</i>                  | 23 / 9                                    | 6          | PSEN1:p.Ala275Val, PSEN1:p.Glu280Ala, PSEN1:p.Glu280Gly, PSEN1:p.Phe283Leu, PSEN1:p.Tyr288His, PSEN1:exon9del                                                                                                                               | -6.67/9.05                   | 34.35/8.11                   | 41.02/4.36                            |
| <i>PSEN1 Transmembrane Domain 2</i>                | 18 / 13                                   | 8          | PSEN1:p.Asn135Ser, PSEN1:p.Asn135Tyr, PSEN1:p.Ile143Thr, PSEN1:p.Met139Ile, PSEN1:p.Met146Ile, PSEN1:p.Met146Leu, PSEN1:p.Met146Val, PSEN1:p.Thr147Ile                                                                                      | -5.50/7.20                   | 32.11/6.27                   | 37.61/6.28                            |
| <i>PSEN1 Transmembrane Domain 3</i>                | 13 / 7                                    | 6          | PSEN1:p.Ser169Leu, PSEN1:p.Ser170Phe, PSEN1:p.Leu171Pro, PSEN1:p.Phe176Val, PSEN1:p.Ser178Pro, PSEN1:p.Glu184Asp                                                                                                                            | -6.10/6.13                   | 35.46/8.17                   | 41.56/6.81                            |
| <i>PSEN1 Transmembrane Domain 4</i>                | 21 / 14                                   | 5          | PSEN1:p.Ile202Phe, PSEN1:p.Gly206Ala, PSEN1:p.Gly209Glu, PSEN1:p.Gly209Val, PSEN1:p.Ser212Tyr                                                                                                                                               | -6.86/13.12                  | 43.90/10.86                  | 50.77/8.00                            |
| <i>PSEN1 Transmembrane Domain 5</i>                | 12 / 10                                   | 8          | PSEN1:p.Gln222His, PSEN1:p.Ile229Phe, PSEN1:p.Leu226Arg, PSEN1:p.Ser230Asn, PSEN1:p.Met233Leu, PSEN1:p.Met233Thr, PSEN1:p.Leu235Val, PSEN1:p.Ile238Met                                                                                      | -8.25/8.89                   | 38.50/9.48                   | 46.75/9.79                            |
| <i>PSEN1 Transmembrane Domain 6</i>                | 28 / 12                                   | 7          | PSEN1:p.Ala260Gly, PSEN1:p.Ala260Val, PSEN1:p.Val261Phe, PSEN1:p.Pro264Leu, PSEN1:p.Pro267Leu, PSEN1:p.Arg269His, PSEN1:p.Leu271Val                                                                                                         | -8.44/11.62                  | 43.57/11.39                  | 52.01/6.24                            |
| <i>PSEN1 Transmembrane Domain 8</i>                | 16 / 4                                    | 2          | PSEN1:p.Cys410Tyr, PSEN1:p.Ala426Pro                                                                                                                                                                                                        | -7.24/13.26                  | 37.00/11.71                  | 44.24/5.56                            |
| <i>Ungrouped Carriers</i>                          | 34 / 24                                   | 12         | APP:p.Lys670_Met671delinsAsnLeu, APP:duplication, PSEN1:p.Ala79Val, PSEN1:p.Met84Val, PSEN1:p.Cys92Ser, PSEN1:p.Phe105Leu, PSEN1:p.Tyr115His, PSEN1:p.His163Arg, PSEN1:p.Gly217Arg, PSEN1:p.Leu219Pro, PSEN1:p.Thr245Pro, PSEN1:p.Ala431Glu | -9.74/10.74                  | 37.18/10.61                  | 46.92/7.53                            |
| <b>Dataset B:</b>                                  |                                           |            |                                                                                                                                                                                                                                             |                              |                              |                                       |
| <i>PSEN1 pathogenic variant prior to codon 200</i> | 54 / 35                                   | 20         | <i>PSEN1 variants in blue (above)</i>                                                                                                                                                                                                       | -8.04/9.10                   | 34.93/8.88                   | 42.97/8.31                            |
| <i>PSEN1 pathogenic variant after codon 200</i>    | 107 / 55                                  | 33         | <i>PSEN1 variants in red (above)</i>                                                                                                                                                                                                        | -7.30/11.10                  | 39.66/10.91                  | 46.96/7.92                            |

**Supplemental Table 2: Variant Coding DNA Reference Sequences**

| Gene         | Variant gDNA consequence          | Variant cDNA consequence    | Variant protein consequence |
|--------------|-----------------------------------|-----------------------------|-----------------------------|
| <i>APP</i>   | chr21:g.27269938_27269939delinsGA | c.2010_2011delinsTC         | p.Lys670_Met671delinsAsnLeu |
| <i>APP</i>   | chr21:g.27264101A>G               | c.2144T>C                   | p.Val715Ala                 |
| <i>APP</i>   | chr21:g.27264099T>C               | c.2146A>G                   | p.Ile716Val                 |
| <i>APP</i>   | chr21:g.27264099T>A               | c.2146A>T                   | p.Ile716Phe                 |
| <i>APP</i>   | chr21:g.27264096C>T               | c.2149G>A                   | p.Val717Ile                 |
| <i>APP</i>   | chr21:g.27264096C>G               | c.2149G>C                   | p.Val717Leu                 |
| <i>APP</i>   | chr21:g.27264077A>C               | c.2168T>G                   | p.Leu723Arg                 |
| <i>APP</i>   | -                                 | -                           | dup                         |
| <i>PSEN1</i> | chr14:g.73683933G>A               | c.1229G>A                   | p.Cys410Tyr                 |
| <i>PSEN1</i> | chr14:g.73685869G>C               | c.1276G>C                   | p.Ala426Pro                 |
| <i>PSEN1</i> | chr14:g.73685885C>A               | c.1292C>A                   | p.Ala431Glu                 |
| <i>PSEN1</i> | chr14:g.73637653C>T               | c.236C>T                    | p.Ala79Val                  |
| <i>PSEN1</i> | chr14:g.73637667A>G               | c.250A>G                    | p.Met84Val                  |
| <i>PSEN1</i> | chr14:g.73637691T>A               | c.274T>A                    | p.Cys92Ser                  |
| <i>PSEN1</i> | chr14:g.73637730T>C               | c.313T>C                    | p.Phe105Leu                 |
| <i>PSEN1</i> | chr14:g.73640278T>C               | c.343T>C                    | p.Tyr115His                 |
| <i>PSEN1</i> | chr14:g.73640338A>T               | c.403A>T                    | p.Asn135Tyr                 |
| <i>PSEN1</i> | chr14:g.73640339A>G               | c.404A>G                    | p.Asn135Ser                 |
| <i>PSEN1</i> | chr14:g.73640352G>C               | c.417G>C                    | p.Met139Ile                 |
| <i>PSEN1</i> | chr14:g.73640363T>C               | c.428T>C                    | p.Ile143Thr                 |
| <i>PSEN1</i> | chr14:g.73640371A>C               | c.436A>C                    | p.Met146Leu                 |
| <i>PSEN1</i> | chr14:g.73640371A>G               | c.436A>G                    | p.Met146Val                 |
| <i>PSEN1</i> | chr14:g.73640373G>C               | c.438G>C                    | p.Met146Ile                 |
| <i>PSEN1</i> | chr14:g.73640375C>T               | c.440C>T                    | p.Thr147Ile                 |
| <i>PSEN1</i> | chr14:g.73653568A>G               | c.488A>G                    | p.His163Arg                 |
| <i>PSEN1</i> | chr14:g.73653586C>T               | c.506C>T                    | p.Ser169Leu                 |
| <i>PSEN1</i> | chr14:g.73653589C>T               | c.509C>T                    | p.Ser170Phe                 |
| <i>PSEN1</i> | chr14:g.73653592T>C               | c.512T>C                    | p.Leu171Pro                 |
| <i>PSEN1</i> | chr14:g.73653606T>G               | c.526T>G                    | p.Phe176Val                 |
| <i>PSEN1</i> | chr14:g.73653612T>C               | c.532T>C                    | p.Ser178Pro                 |
| <i>PSEN1</i> | chr14:g.73659355A>C               | c.552A>C                    | p.Glu184Asp                 |
| <i>PSEN1</i> | chr14:g.73659407A>T               | c.604A>T                    | p.Ile202Phe                 |
| <i>PSEN1</i> | chr14:g.73659420G>C               | c.617G>C                    | p.Gly206Ala                 |
| <i>PSEN1</i> | chr14:g.73659429G>A               | c.626G>A                    | p.Gly209Glu                 |
| <i>PSEN1</i> | chr14:g.73659429G>T               | c.626G>T                    | p.Gly209Val                 |
| <i>PSEN1</i> | chr14:g.73659438C>A               | c.635C>A                    | p.Ser212Tyr                 |
| <i>PSEN1</i> | chr14:g.73659452G>C               | c.649G>C                    | p.Gly217Arg                 |
| <i>PSEN1</i> | chr14:g.73659459T>C               | c.656T>C                    | p.Leu219Pro                 |
| <i>PSEN1</i> | chr14:g.73659469G>T               | c.666G>T                    | p.Gln222His                 |
| <i>PSEN1</i> | chr14:g.73659480T>G               | c.677T>G                    | p.Leu226Arg                 |
| <i>PSEN1</i> | chr14:g.73659488A>T               | c.685A>T                    | p.Ile229Phe                 |
| <i>PSEN1</i> | chr14:g.73659492G>A               | c.689G>A                    | p.Ser230Asn                 |
| <i>PSEN1</i> | chr14:g.73659500A>C               | c.697A>C                    | p.Met233Leu                 |
| <i>PSEN1</i> | chr14:g.73659501T>C               | c.698T>C                    | p.Met233Thr                 |
| <i>PSEN1</i> | chr14:g.73659506C>G               | c.703C>G                    | p.Leu235Val                 |
| <i>PSEN1</i> | chr14:g.73659517C>G               | c.714C>G                    | p.Ile238Met                 |
| <i>PSEN1</i> | chr14:g.73659536A>C               | c.733A>C                    | p.Thr245Pro                 |
| <i>PSEN1</i> | chr14:g.73664748C>G               | c.779C>G                    | p.Ala260Gly                 |
| <i>PSEN1</i> | chr14:g.73664748C>T               | c.779C>T                    | p.Ala260Val                 |
| <i>PSEN1</i> | chr14:g.73664750G>T               | c.781G>T                    | p.Val261Phe                 |
| <i>PSEN1</i> | chr14:g.73664760C>T               | c.791C>T                    | p.Pro264Leu                 |
| <i>PSEN1</i> | chr14:g.73664769C>T               | c.800C>T                    | p.Pro267Leu                 |
| <i>PSEN1</i> | chr14:g.73664775G>A               | c.806G>A                    | p.Arg269His                 |
| <i>PSEN1</i> | chr14:g.73664780C>G               | c.811C>G                    | p.Leu271Val                 |
| <i>PSEN1</i> | chr14:g.73664793C>T               | c.824C>T                    | p.Ala275Val                 |
| <i>PSEN1</i> | chr14:g.73664808A>C               | c.839A>C                    | p.Glu280Ala                 |
| <i>PSEN1</i> | chr14:g.73664808A>G               | c.839A>G                    | p.Glu280Gly                 |
| <i>PSEN1</i> | chr14:g.73664816T>C               | c.847T>C                    | p.Phe283Leu                 |
| <i>PSEN1</i> | chr14:g.73664831T>C               | c.862T>C                    | p.Tyr288His                 |
| <i>PSEN1</i> | chr14:g.73671096_73676953del15858 | c.869-1998_956-1524del15858 | p.S290C;T291_S319del        |
| <i>PSEN1</i> | chr14:g.73673093G>A               | c.869-1G>A                  | p.S290C;T291_S319del        |
| <i>PSEN1</i> | chr14:g.73673093G>T               | c.869-1G>T                  | p.S290C;T291_S319del        |
| <i>PSEN2</i> | chr1:g.227073304A>T               | c.422A>T                    | p.Asn141Ile                 |

**Supplemental Table 3: Effect of Reference Region on PiB PET Findings**

| <i>Reference Region:</i> | <b>Domain-Based Grouping</b>    | <b>Codon-Based Grouping</b>      |
|--------------------------|---------------------------------|----------------------------------|
| Cerebellar Gray          | F(9,170.96) = 5.82, p = 3.32e-7 | F(1,154.99) = 21.70, p = 2.24e-6 |
| Brainstem                | F(9,173.90) = 4.85, p = 3.13e-6 | F(1,156.60) = 9.70, p = 0.0036   |
| White Matter             | F(9,173.35) = 5.14, p = 1.69e-5 | F(1,154.96) = 11.55, p = 0.0016  |

*P-values shown are FDR corrected*

**Supplemental Table 4: Sensitivity Analyses Examining Variant Grouping x EYO Associations with Cortical PiB PET SUVR**

|                                                   | Effect of Domain Grouping |              | Effect of Codon Grouping |              |
|---------------------------------------------------|---------------------------|--------------|--------------------------|--------------|
|                                                   | F Value                   | p            | F Value                  | p            |
| Including All Families and Groupings              | F(9, 170.96) = 5.17       | p = 3.13e-06 | F(1, 154.99) = 21.71     | p = 2.24e-05 |
| Excluding Families with Cooks D > 1 SD from mean  | F(9, 149.24) = 5.98       | p = 3.14e-06 | F(1, 145.15) = 24.18     | p = 1.22e-05 |
| Excluding PSEN2 Carriers                          | F(8, 165.47) = 5.27       | p = 2.24e-05 | NA                       | NA           |
| Excluding APP Carriers                            | F(8, 149.28) = 6.32       | p = 3.13e-06 | NA                       | NA           |
| Excluding All APOE ε4 carriers                    | F(9, 107.80) = 4.81       | p = 5.21e-05 | F(1, 104.762) = 15.32    | p = 3.23e-04 |
| Excluding All APOE ε2 carriers                    | F(9, 139.53) = 3.18       | p = 2.67e-03 | F(1, 134.542) = 16.94    | p = 1.51e-04 |
| Covarying Weighted Polygenic AD Risk Scores (PRS) | F(9, 164.55) = 5.14       | p = 1.70e-05 | F(1, 153.69) = 21.13     | p = 2.44e-05 |
| Excluding PRS > 1 SD from mean                    | F(9, 139.61) = 5.68       | p = 6.36e-06 | F(1, 135.43) = 15.71     | p = 2.58e-04 |

*P-values shown are FDR corrected*

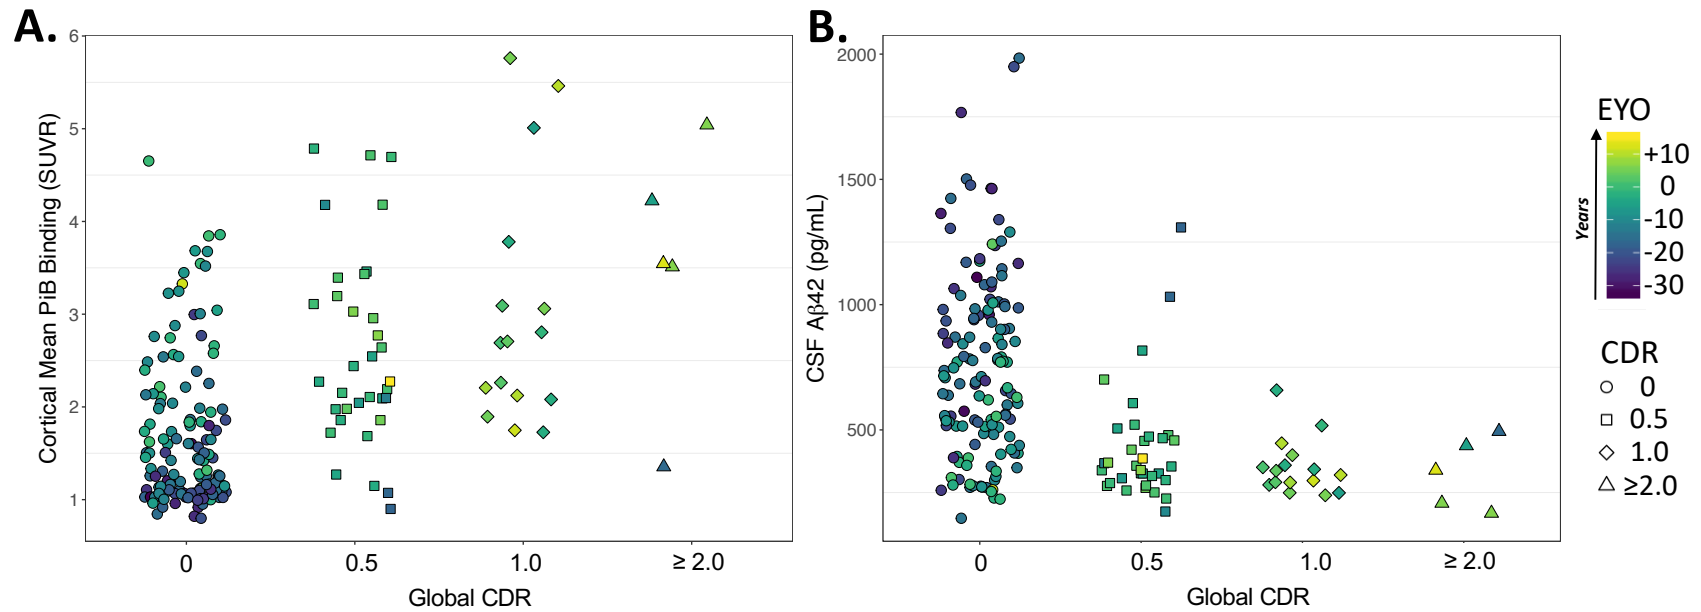

**Supplemental Figure 1:** *Amyloid Measures Grouped by Global Clinical Dementia Rating: Cortical mean PiB PET binding (Panel A) and CSF A $\beta$ 42 (Panel B) in autosomal dominant Alzheimer's disease pathogenic variant carriers grouped by global Clinical Dementia Rating (CDR). Color indicates each individual pathogenic variant carrier's estimated years from symptom onset (EYO).*

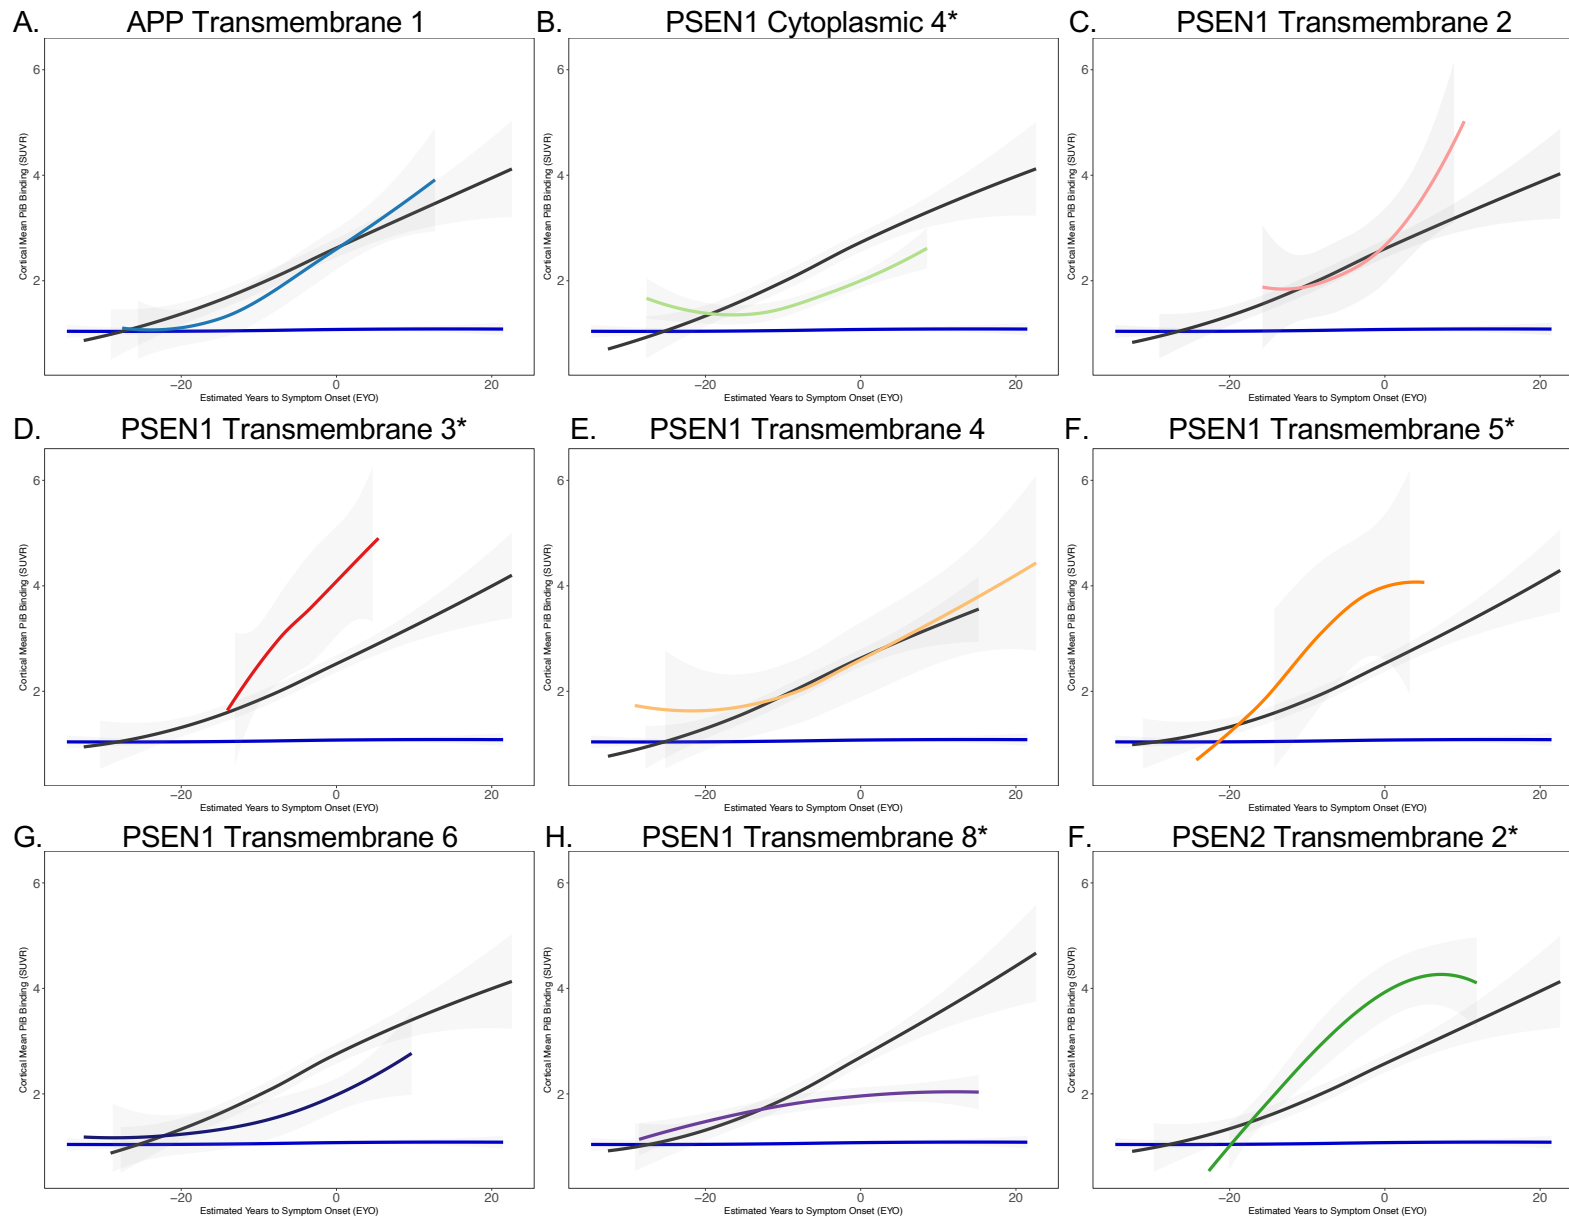

**Supplemental Figure 2:** *Amyloid Trajectories Differ Across Domain-based Variant Groups:* Cortical mean PiB PET binding across EYO is compared between each domain-based group (colored lines in A-F) and all other pathogenic variant carriers (Black lines). Pathogenic variant non-carriers (Blue line) are shown for illustration purposes and non-carriers were not included in statistical comparisons. \* denotes FDR corrected  $p \leq 0.05$  for a significant group by EYO interaction comparing each domain-based group to all other pathogenic variant carriers.

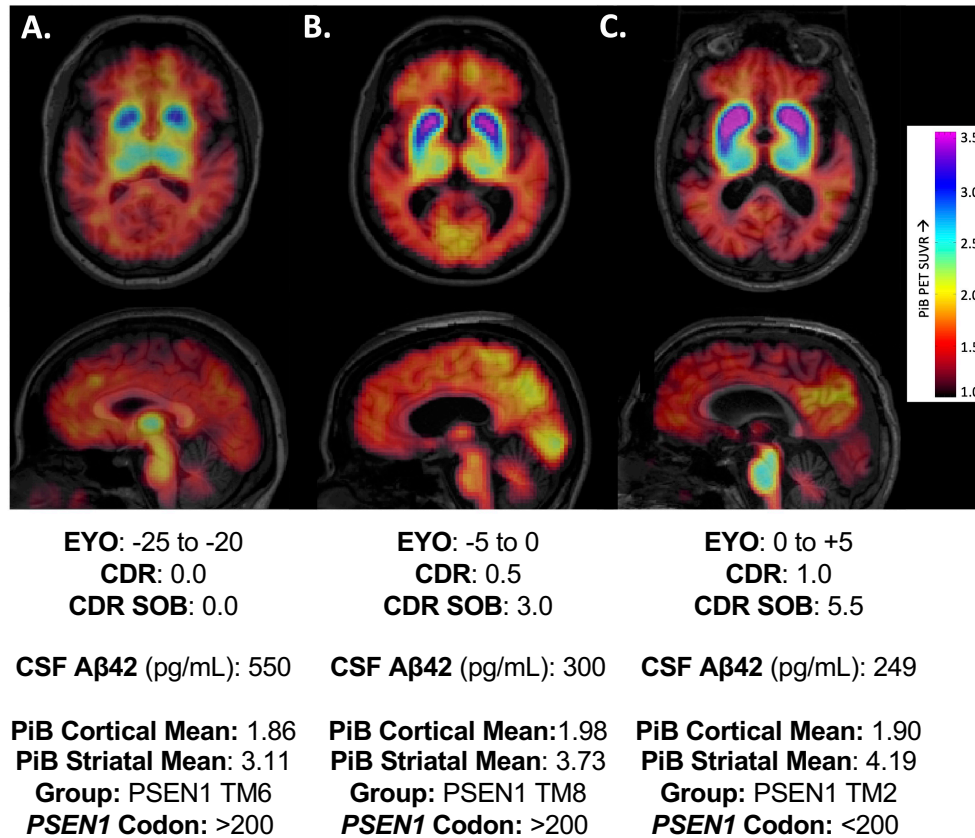

**Supplemental Figure 3:** *Regional Variability in Amyloid Burden: Examples of Striatal Predominant Patterns.* Three examples across a range of estimated years to symptom onset (EYO) and impairment (Clinical Dementia Rating: CDR; Sum of Boxes: SOB) that show greater striatal compared to cortical amyloid burden as assessed by PiB PET. These images were chosen to demonstrate the heterogeneity present in  $\beta$ -amyloid measures across the course of autosomal dominant Alzheimer's disease. Transmembrane domain abbreviated as TM.

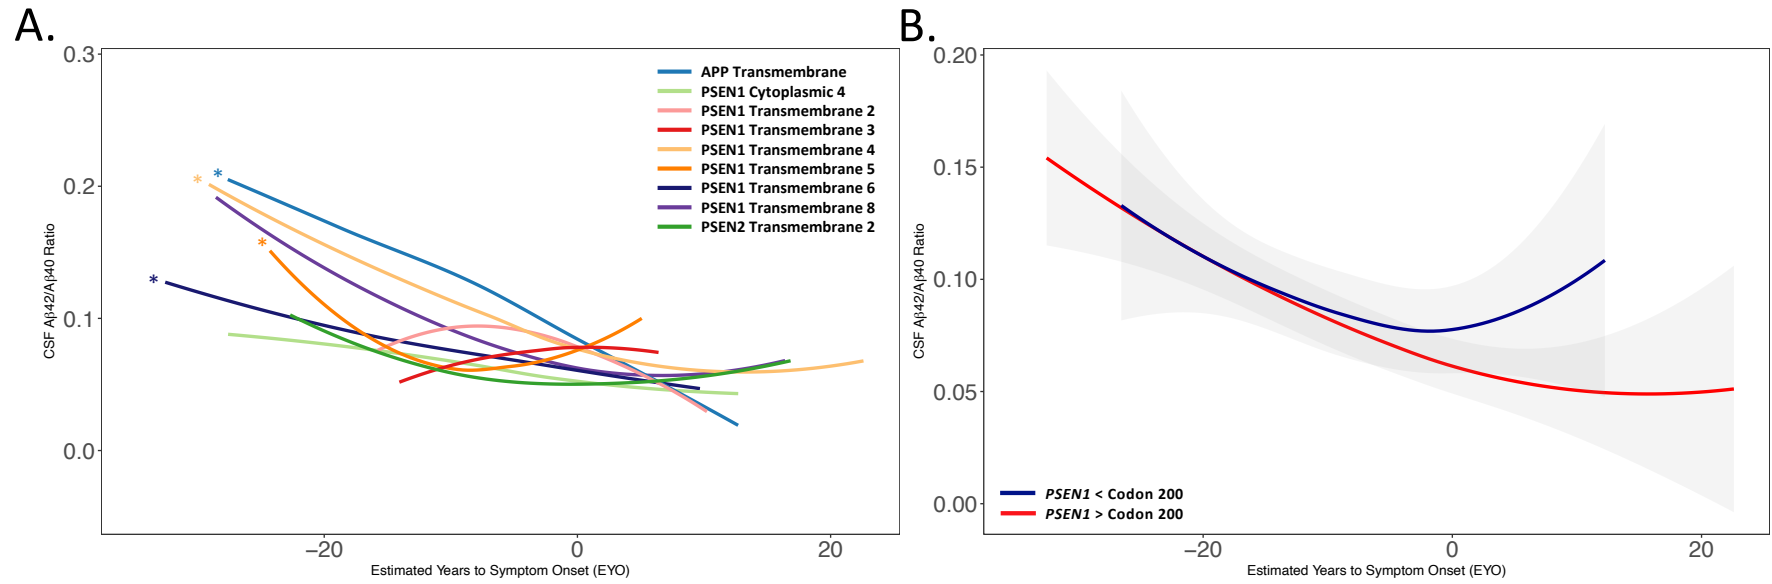

**Supplemental Figure 4:** CSF Aβ42/Aβ40 across variant groupings: Ratios of CSF Aβ42/40 were calculated for domain-based variant groupings (Panel A) and the PSEN1 codon 200 based grouping (Panel B). \* denotes FDR corrected  $p < 0.05$  for a significant variant group by EYO interaction.



**A.**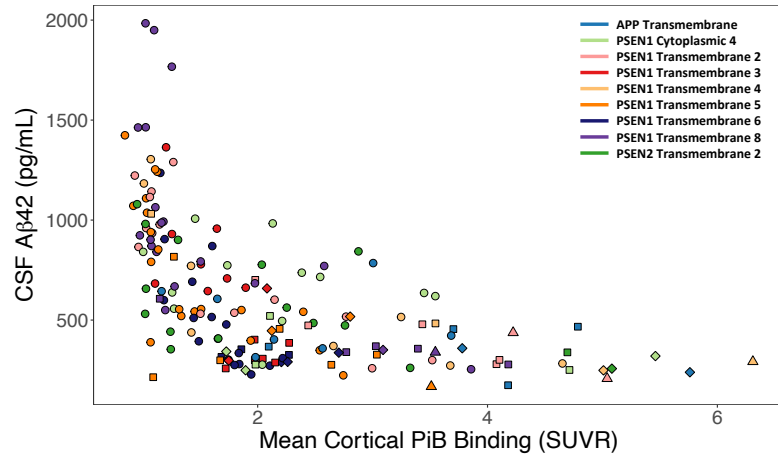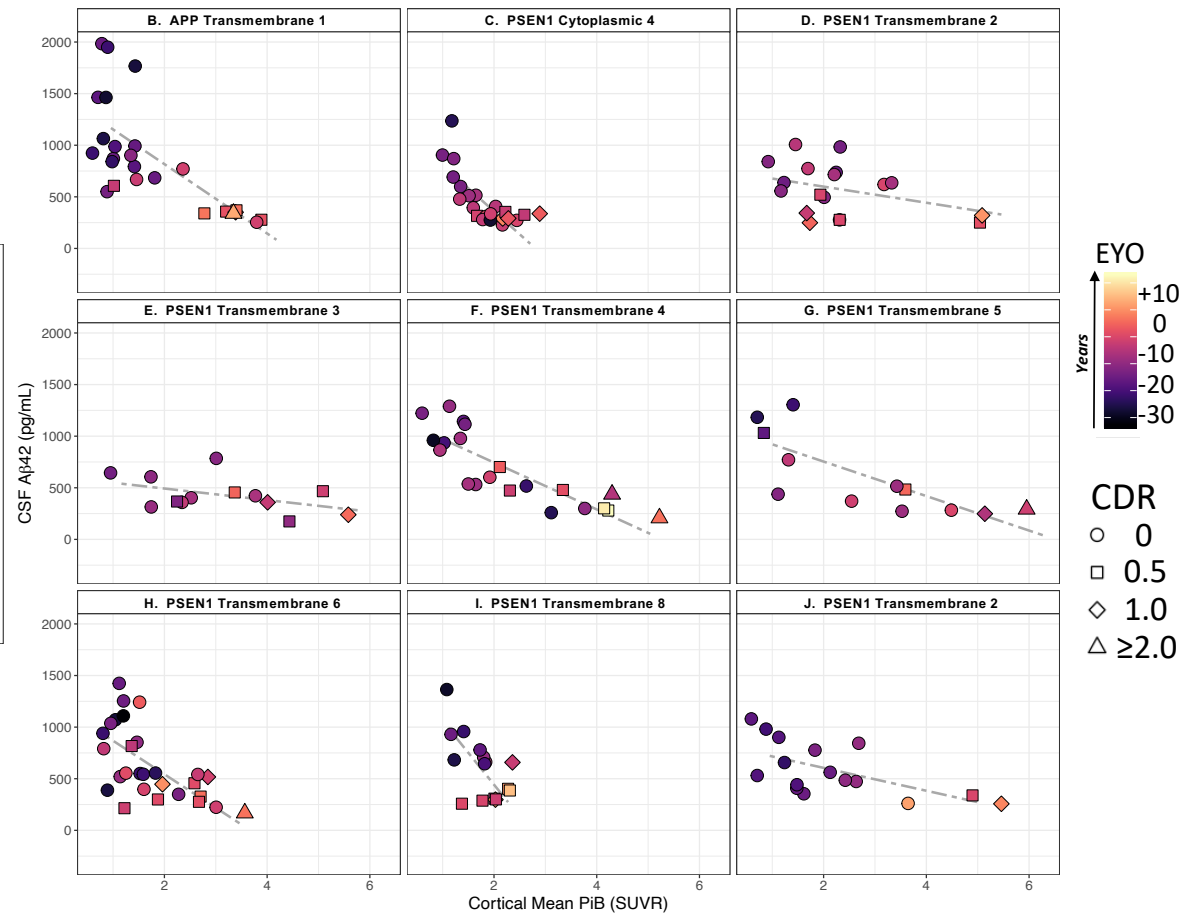

**Supplemental Figure 5:** *CSF Aβ42 Relative to Amyloid PET, Accounting for Variant Category:* Relationships between CSF Aβ42 and PET based measures of β-amyloid burden were assessed across all domain-based variant groupings (Panel A) and across individual variant groupings (Panels B-J). Only pathogenic variant carriers are shown.

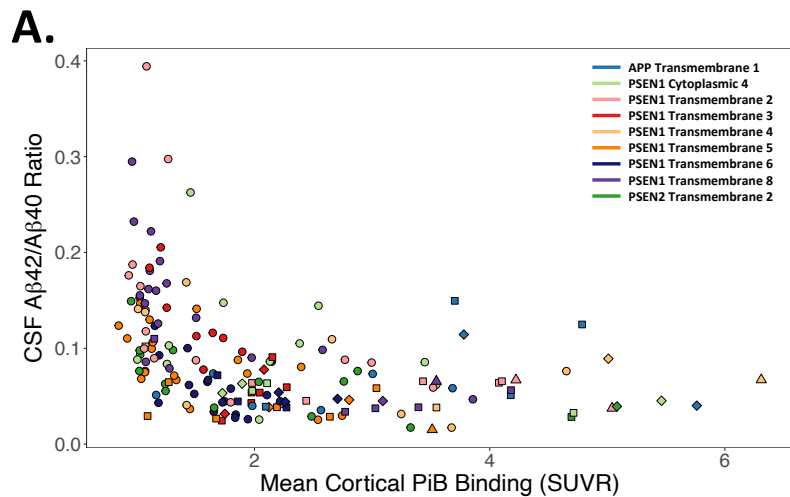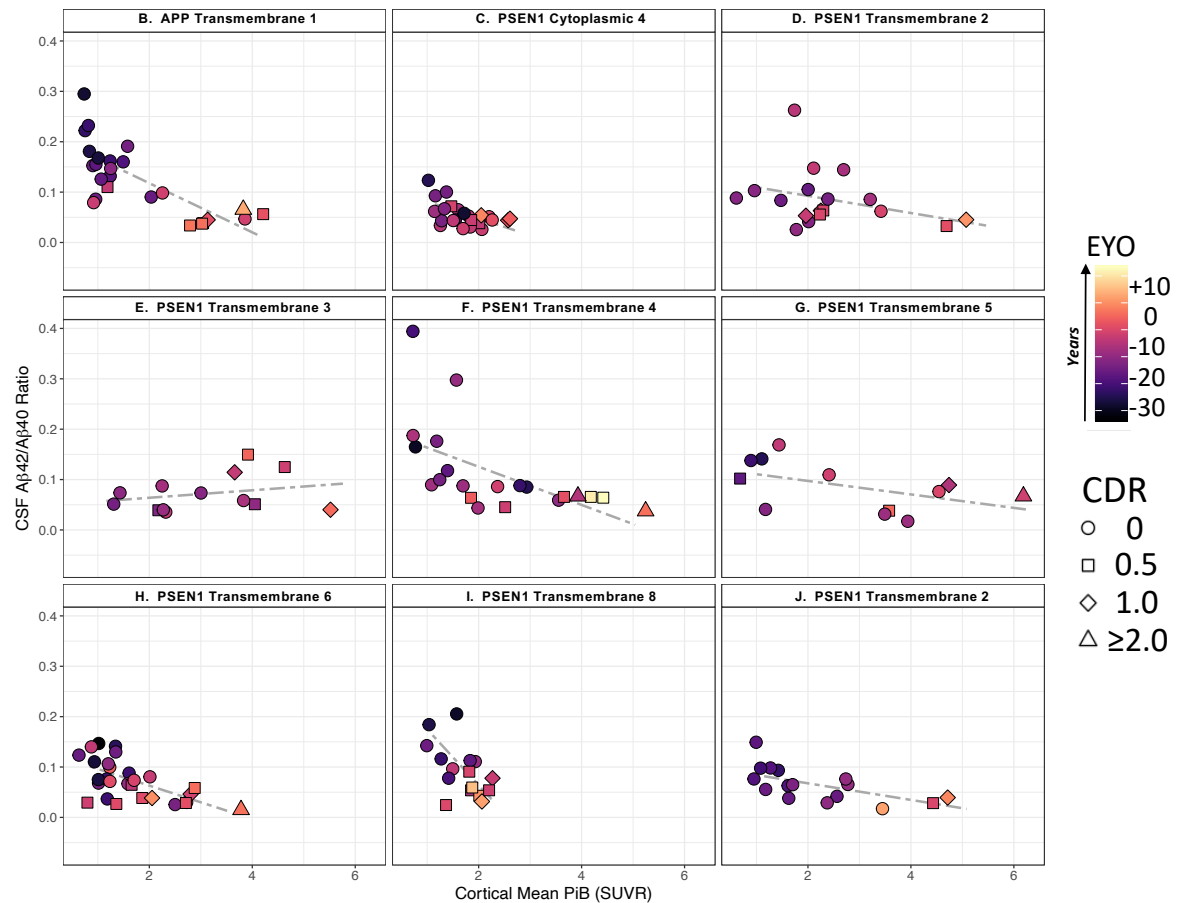

**Supplemental Figure 6:** CSF A $\beta$ 42/ A $\beta$ 40 Ratio Relative to Amyloid PET, Accounting for Variant Category: Relationships between the CSF A $\beta$ 42/40 ratio and PET based measures of  $\beta$ -amyloid burden were assessed across all domain-based variant groupings (Panel A) and across individual variant groupings (Panels B-J). Only pathogenic variant carriers are shown.

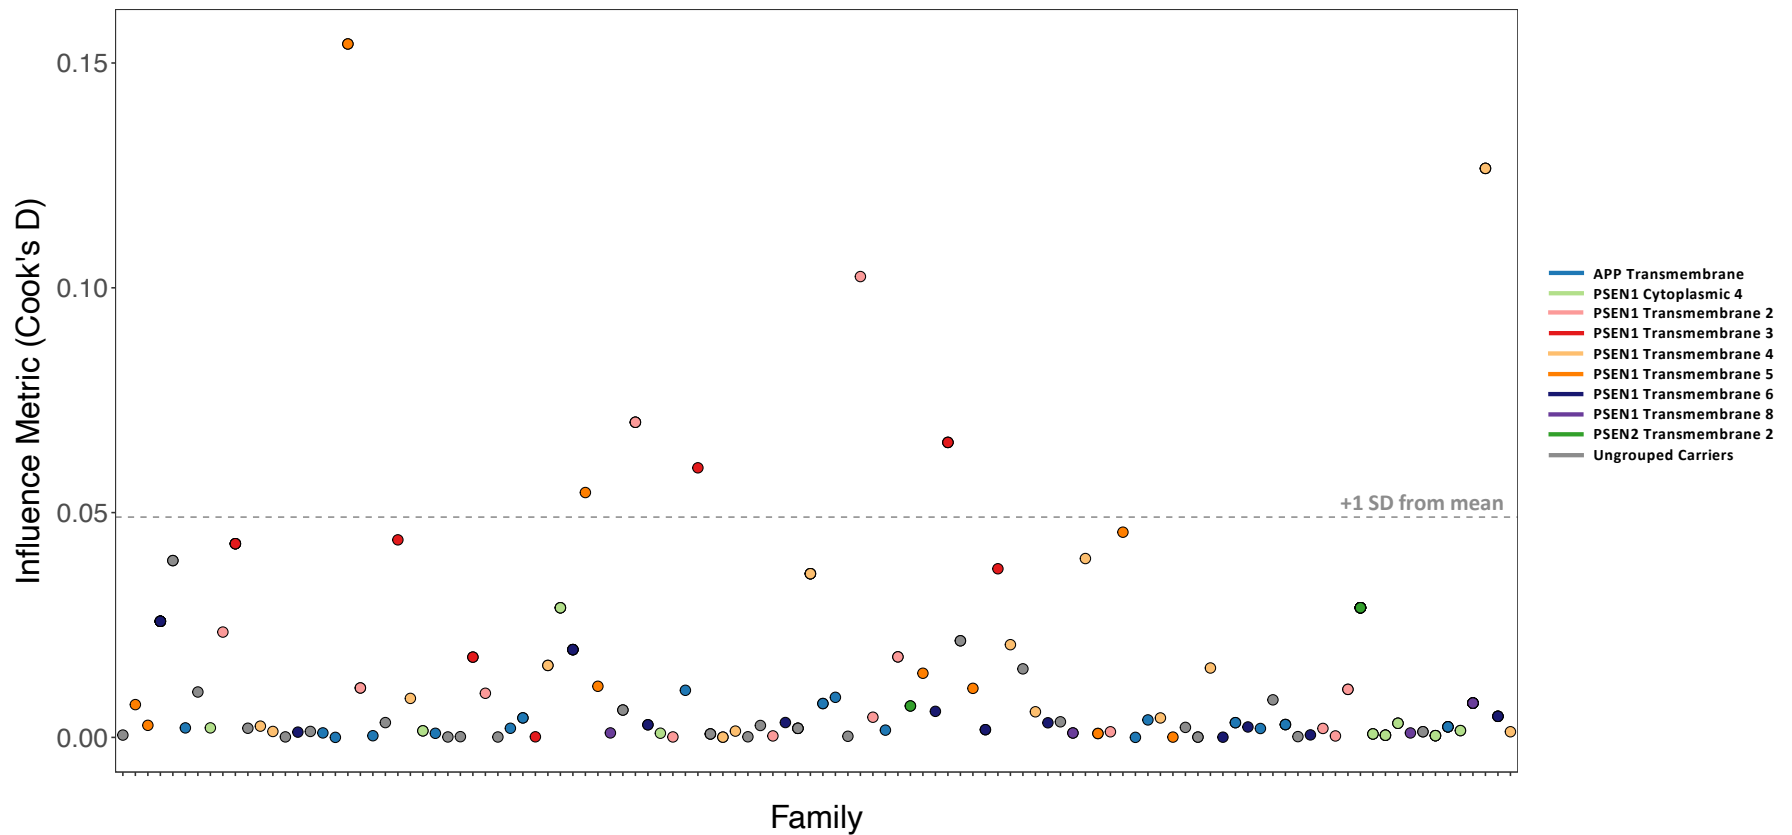

**Supplemental Figure 7: Effects of Family Membership on Amyloid PET Results:** Influence metrics were calculated for each family in the sample in models examining associations between PiB PET and domain-based variant groupings. Colors denote each domain-based group. Dashed line indicates 1 standard deviation above the group mean value for the influence metric used (Cook's D).
